# Supplementary material for: Regioisomerism in cationic sulfonyl-substituted [Ir(C^N)2(N^N)]+ complexes: its influence on photophysical properties and LEC performance
Source: Royal Society of Chemistry journal article supplement (doi:10.1039/c6dt01325b), 2016-01-01
Supplement: c6dt01325b1.pdf [file c6dt01325b1.pdf]

## Electronic Supporting Information

# Regioisomerism in cationic sulfonyl-substituted $[\text{Ir}(\text{C}^{\wedge}\text{N})_2(\text{N}^{\wedge}\text{N})]^+$ complexes: influence on photophysical properties and LEC performance

Cathrin D. Ertl,<sup>a</sup> Lidón Gil-Escrig,<sup>b</sup> Jesús Cerdá,<sup>b</sup> Antonio Pertegás,<sup>b</sup> Henk J. Bolink,<sup>b</sup> José M. Junquera-Hernández,<sup>b</sup> Alessandro Prescimone,<sup>a</sup> Markus Neuburger,<sup>a</sup> Edwin C. Constable,<sup>a</sup> Enrique Ortí\*<sup>b</sup> and Catherine E. Housecroft\*<sup>a</sup>

<sup>a</sup> Department of Chemistry, University of Basel, Spitalstrasse 51, CH-4056 Basel, Switzerland.

<sup>b</sup> Instituto de Ciencia Molecular, Universidad de Valencia, Catedrático José Beltrán 2, Paterna, E-46980, Spain.

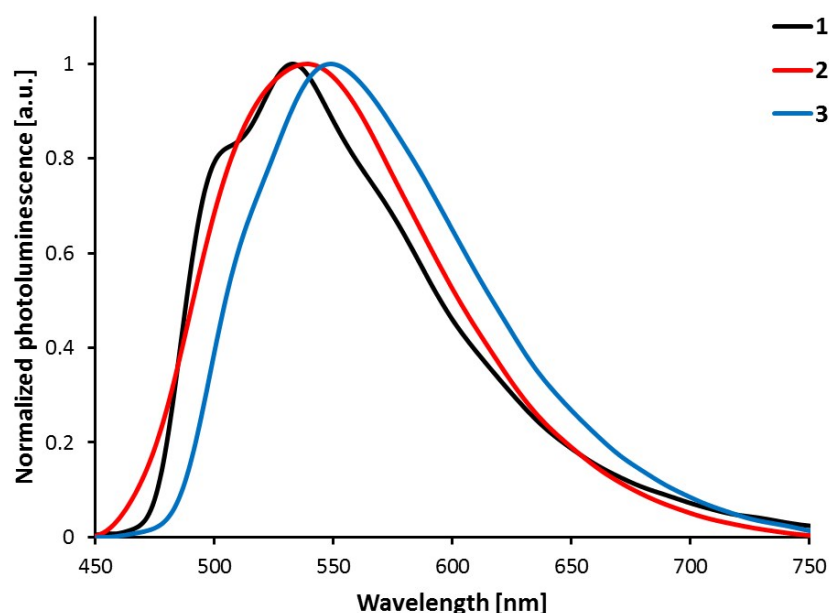

**Fig. S1** Normalized photoluminescence spectra of complexes  $[\text{Ir}(\text{C}^{\wedge}\text{N})_2(\text{bpy})][\text{PF}_6]$  with  $\text{C}^{\wedge}\text{N} = [\mathbf{1}]^-$  to  $[\mathbf{3}]^-$  in the thin film configuration used in LEC devices. The complex is mixed with the ionic liquid  $[\text{Bmim}][\text{PF}_6]$  in a complex:IL 4:1 molar ratio.

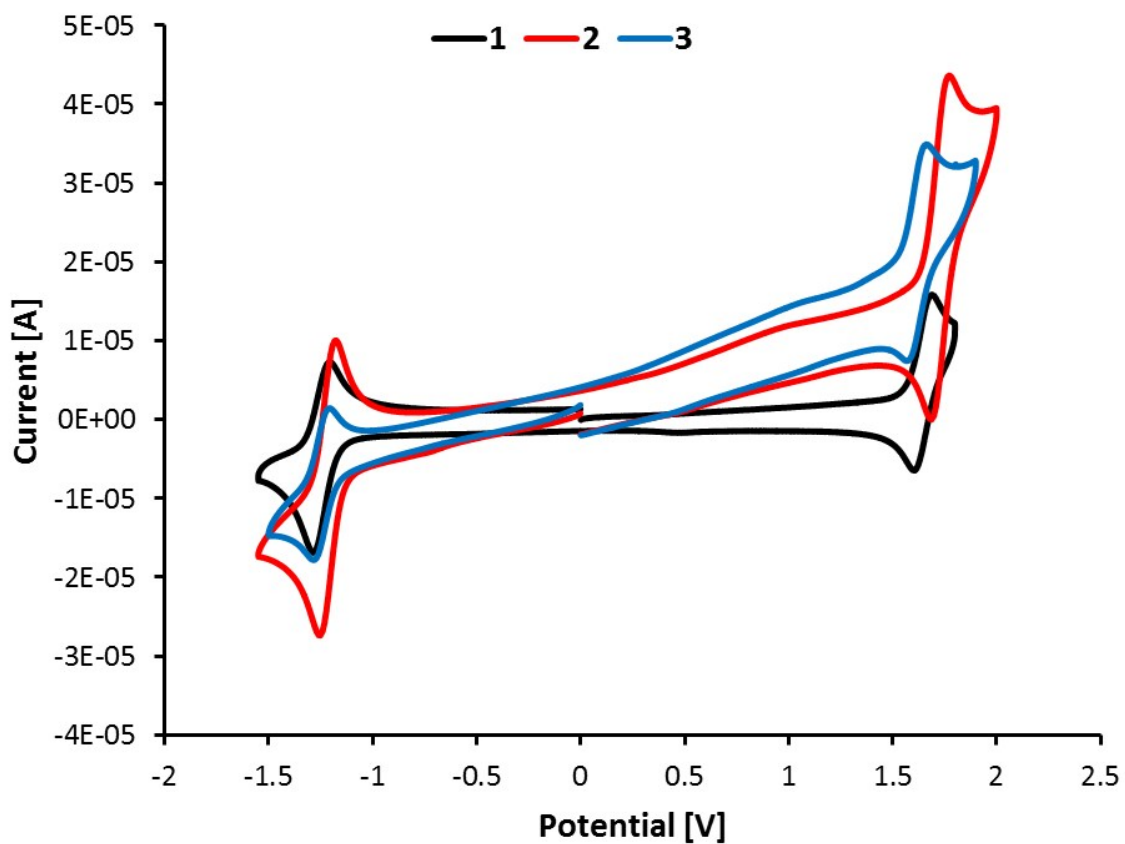

**Fig. S2.** Cyclic voltammograms showing the first oxidation and reduction processes of  $[\text{Ir}(\text{C}^{\text{N}})_2(\text{bpy})][\text{PF}_6]$  ( $\text{C}^{\text{N}} = [\mathbf{1}]^-$ ,  $[\mathbf{2}]^-$  or  $[\mathbf{3}]^-$ ) in MeCN solution referenced to  $\text{Fc}/\text{Fc}^+$  with 0.1 M  $[\text{nBu}_4][\text{PF}_6]$  as supporting electrolyte and a scan rate of  $0.1 \text{ V s}^{-1}$ .

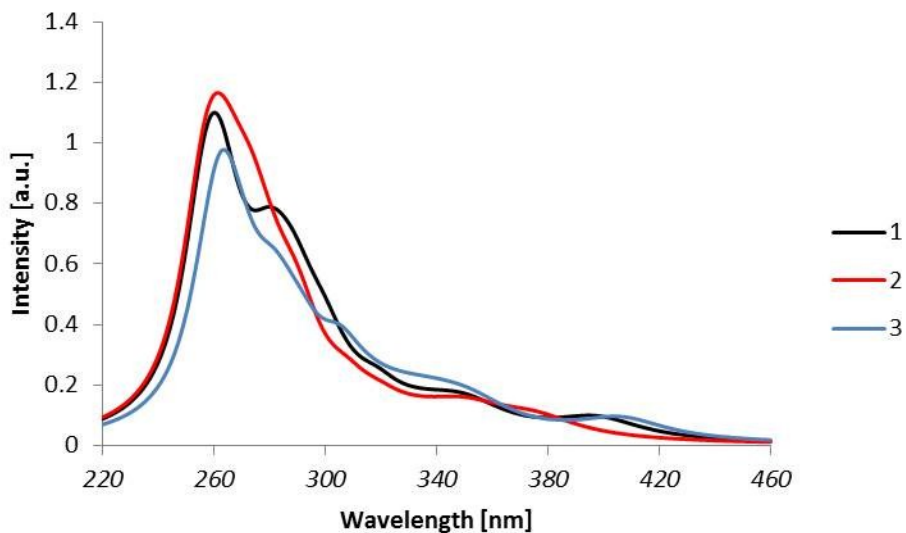

**Fig. S3** Theoretical simulation of the absorption spectrum of complexes  $[\text{Ir}(\text{C}^{\text{N}})_2(\text{bpy})][\text{PF}_6]$  with  $\text{C}^{\text{N}} = [\mathbf{1}]^-$  to  $[\mathbf{3}]^-$  obtained from TD-DFT/B3LYP/(6-31G\*\* + LANL2DZ) calculations of the 40 lowest-energy singlet excited states. The spectra have been obtained as convoluted sums of Lorentzian curves. Each curve is centered on the wavelength value calculated for a singlet excited state, and its area is proportional to the oscillator strength.

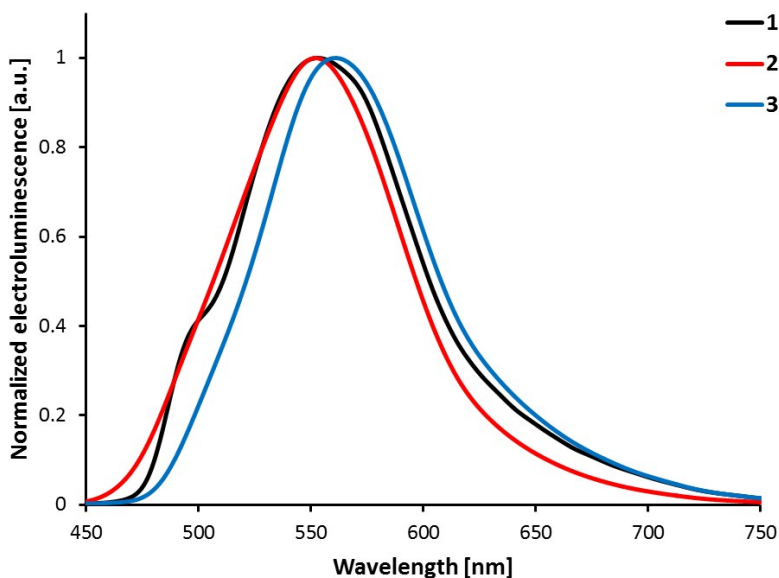

**Fig. S4** Normalized electroluminescence spectra of ITO/PEDOT:PSS/active layer/Al LEC devices measured by applying a block-wave pulsed current of  $100 \text{ A m}^{-2}$  at a frequency of 1 kHz and duty cycles of 50%. Active layer:  $[\text{Ir}(\text{C}^{\text{N}})_2(\text{bpy})][\text{PF}_6]$  ( $\text{C}^{\text{N}} = [\mathbf{1}]^-$  to  $[\mathbf{3}]^-$ ) :  $[\text{Bmim}][\text{PF}_6]$  4:1 molar ratio.

**Table S1** Lowest singlet excited states calculated at the TD-DFT B3LYP/(6-31G\*\*+LANL2DZ) level for complexes [Ir(**1**)<sub>2</sub>(bpy)]<sup>+</sup>, [Ir(**2**)<sub>2</sub>(bpy)]<sup>+</sup> and [Ir(**3**)<sub>2</sub>(bpy)]<sup>+</sup> in acetonitrile. Vertical excitation energies (*E*), oscillator strengths (*f*), dominant monoexcitations with contributions (within parentheses) greater than 20% and description of the excited state. H and L denote HOMO and LUMO, respectively.

| Complex                                          | State          | <i>E</i> (eV/nm) | <i>f</i> | Monoexcitations | Description            |
|--------------------------------------------------|----------------|------------------|----------|-----------------|------------------------|
| [Ir( <b>1</b> ) <sub>2</sub> (bpy)] <sup>+</sup> | S <sub>1</sub> | 2.81/441         | 0.000    | H → L (98)      | <sup>1</sup> MLCT/LLCT |
|                                                  | S <sub>2</sub> | 3.12/397         | 0.067    | H → L+1 (97)    | <sup>1</sup> LC        |
|                                                  | S <sub>5</sub> | 3.55/349         | 0.097    | H-1 → L (50)    | <sup>1</sup> MLCT/LLCT |
| [Ir( <b>2</b> ) <sub>2</sub> (bpy)] <sup>+</sup> | S <sub>1</sub> | 2.89/429         | 0.000    | H → L (99)      | <sup>1</sup> MLCT/LLCT |
|                                                  | S <sub>2</sub> | 3.30/375         | 0.058    | H → L+1 (96)    | <sup>1</sup> LC        |
|                                                  | S <sub>5</sub> | 3.55/350         | 0.084    | H-1 → L (51)    | <sup>1</sup> MLCT/LLCT |
| [Ir( <b>3</b> ) <sub>2</sub> (bpy)] <sup>+</sup> | S <sub>1</sub> | 2.79/445         | 0.000    | H → L (98)      | <sup>1</sup> MLCT/LLCT |
|                                                  | S <sub>2</sub> | 3.05/406         | 0.067    | H → L+1 (97)    | <sup>1</sup> LC        |
|                                                  | S <sub>5</sub> | 3.53/351         | 0.084    | H-1 → L (50)    | <sup>1</sup> MLCT/LLCT |
